# Supplementary material
Source: Springer Nature journal article supplement (https://www.springermedizin.de/resource/supplementary/12970_2007_40_MOESM3_ESM.pdf/9594286)

## Changes in plasma choline concentrations [%]

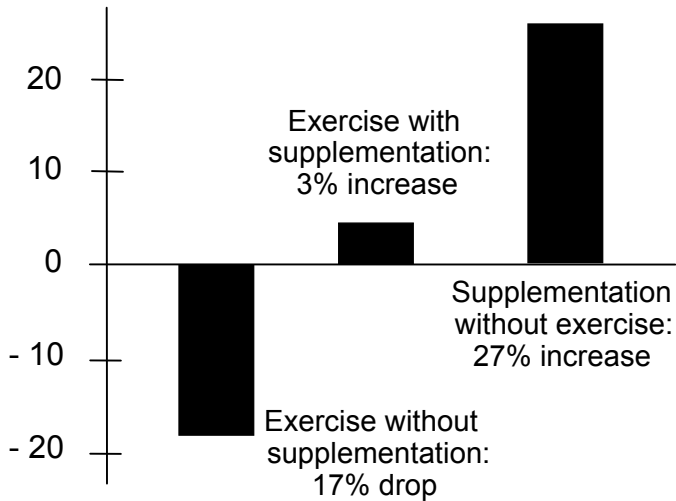

Supplement: MOESM3 [file 9594286]
